# Supplementary material for: A novel method for synthesizing EuS nanocrystals from a single-source precursor under white LED irradiation
Source: Royal Society of Chemistry journal article supplement (doi:10.1039/b413252a), 2004-11-23
Supplement: b413252a.pdf [file b413252a.pdf]

### Supplementary Data

| <i>hkl</i> | JCPDS (75-0868) <i>d</i> [Å] | EuS <i>d</i> [Å] |
|------------|------------------------------|------------------|
| 111        | 3.44                         | 3.44             |
| 200        | 2.97                         | 2.98             |
| 220        | 2.11                         | 2.11             |
| 311        | 1.80                         | 1.80             |
| 222        | 1.72                         |                  |
| 400        | 1.49                         |                  |
| 331        | 1.37                         |                  |
| 420        | 1.33                         | 1.34             |
| 422        | 1.22                         |                  |
| 511        | 1.15                         |                  |

Comparison of *d* values between JCPDS file number and SAED data.

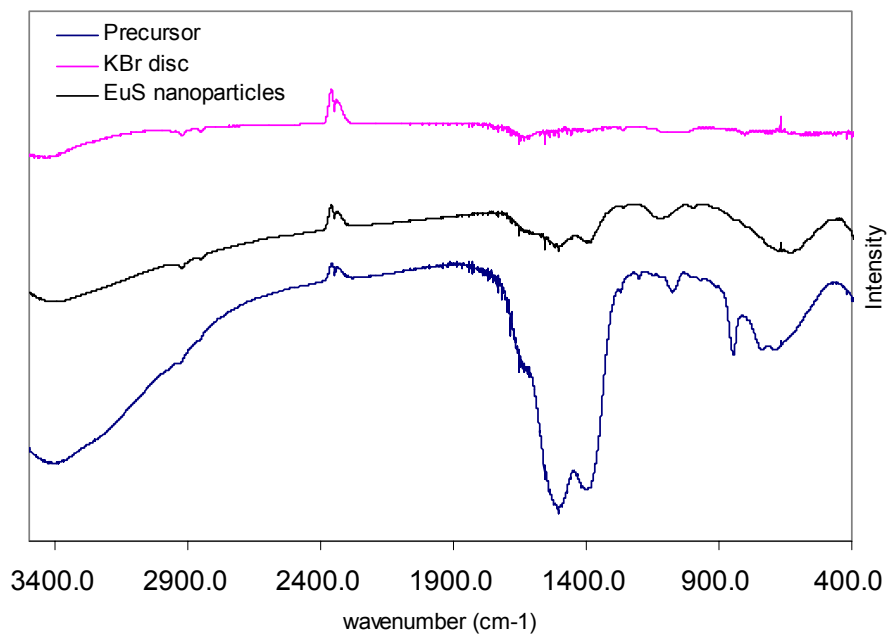

IR spectra of KBr disc, precursor and EuS nanoparticles.

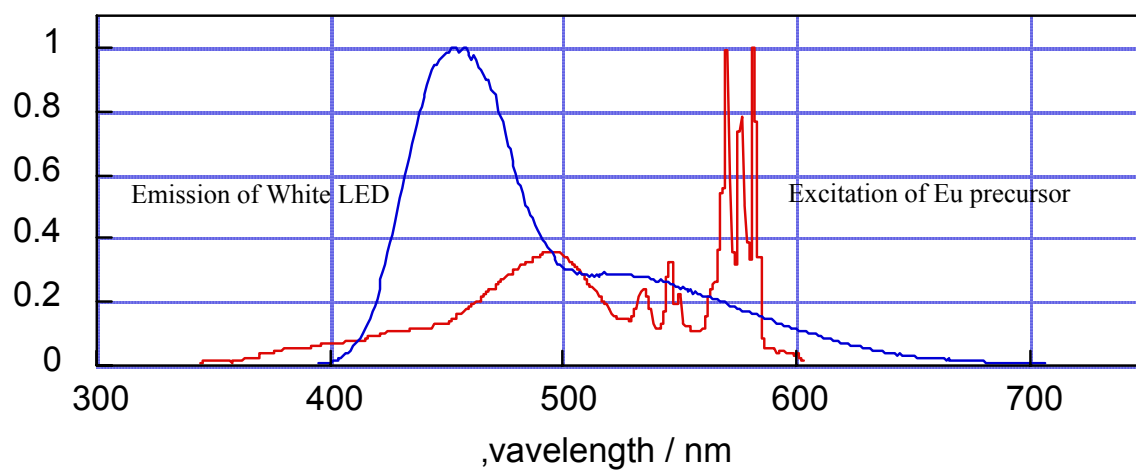

Spectra showing LED emission with an excitation spectrum of the precursor.
